# Supplementary material for: Identifying Tinnitus-Related Genes Based on a Side-Effect Network Analysis
Source: PubMed Central journal article supplement — CPT Pharmacometrics Syst Pharmacol. 2014 Jan 29;3(1):e97–. doi: 10.1038/psp.2013.75 (PMC3910011; doi:10.1038/psp.2013.75), 2014-01-29
Supplement: psp201375x1.pdf [file psp201375x1.pdf]

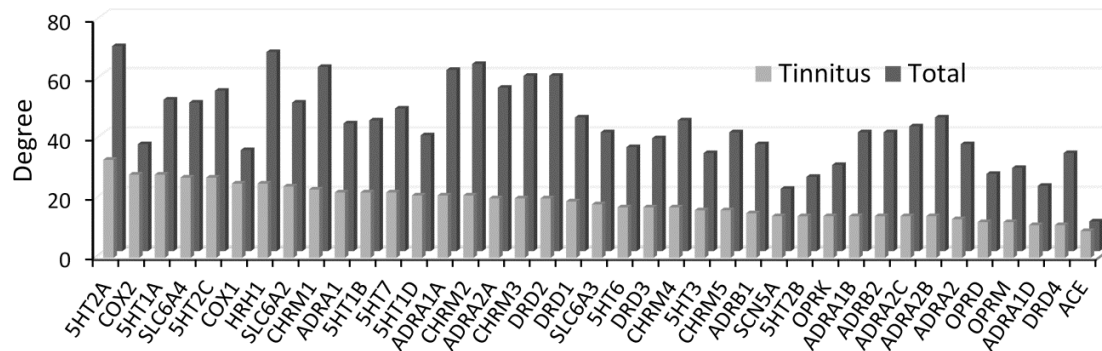

**Supplementary Figure S1. Degree of Targets.** The number of drugs that aimed each target protein in the tinnitus drug-target network is shown by the grey bars. In black the total number each protein is targeted by drugs in the reference database.

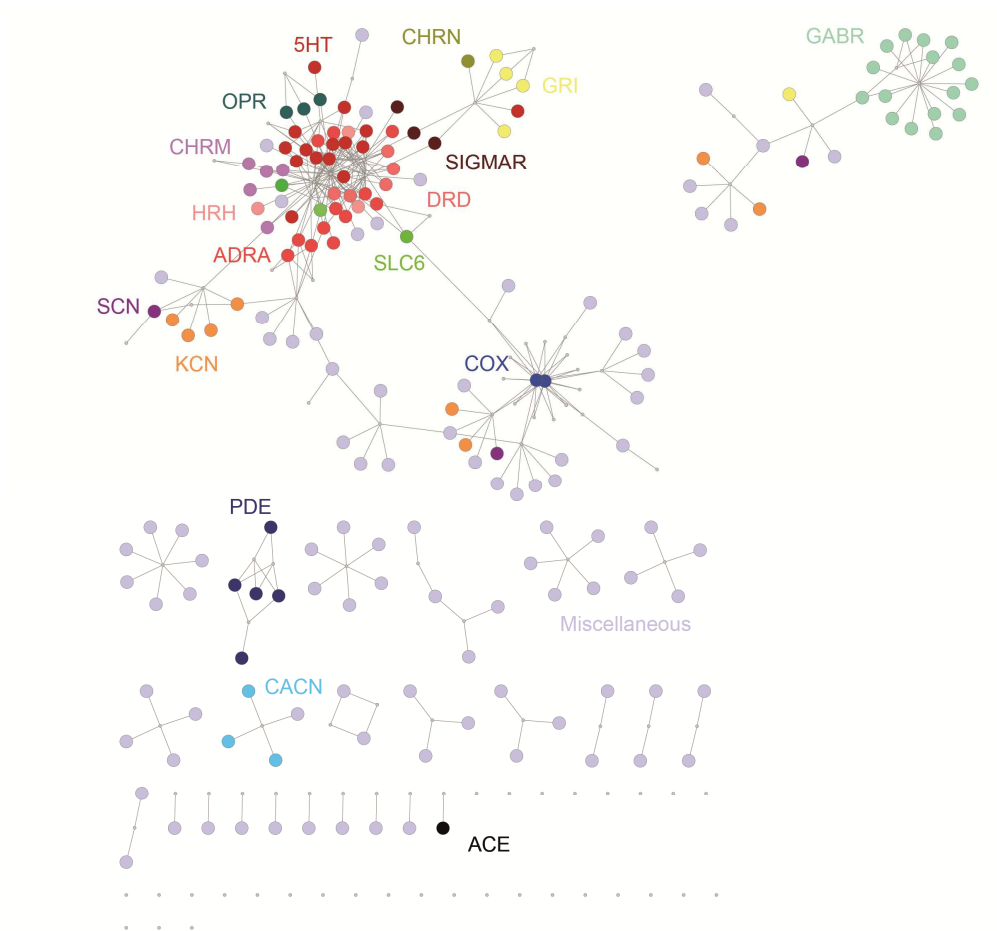

**Supplementary Figure S2. Hearing Impaired Target Network.** A drug-target network was generated with Cytoscape 3.0, by retrieving all drugs that produce hearing impairment as side effect from SIDER 2 and their targets from DrugBank and PDSP Ki. An edge was placed between a drug node and a target node if the protein is a target of that drug in the reference database. Drug nodes were minimized in order to visualize the tinnitus target space. Targets were color-coded according to protein family members.

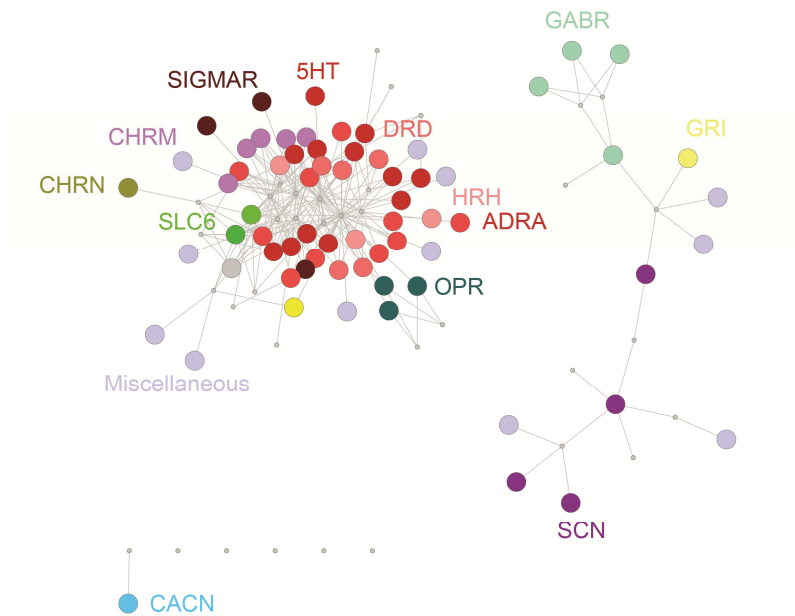

**Supplementary Figure S3. Hyperacusis Target Network.** A drug-target network was generated with Cytoscape 3.0, by retrieving all drugs that produce hyperacusis as side effect from SIDER 2 and their targets from DrugBank and PDSP Ki. An edge was placed between a drug node and a target node if the protein is a target of that drug in the reference database. Drug nodes were minimized in order to visualize the tinnitus target space. Targets were color-coded according to protein family members.

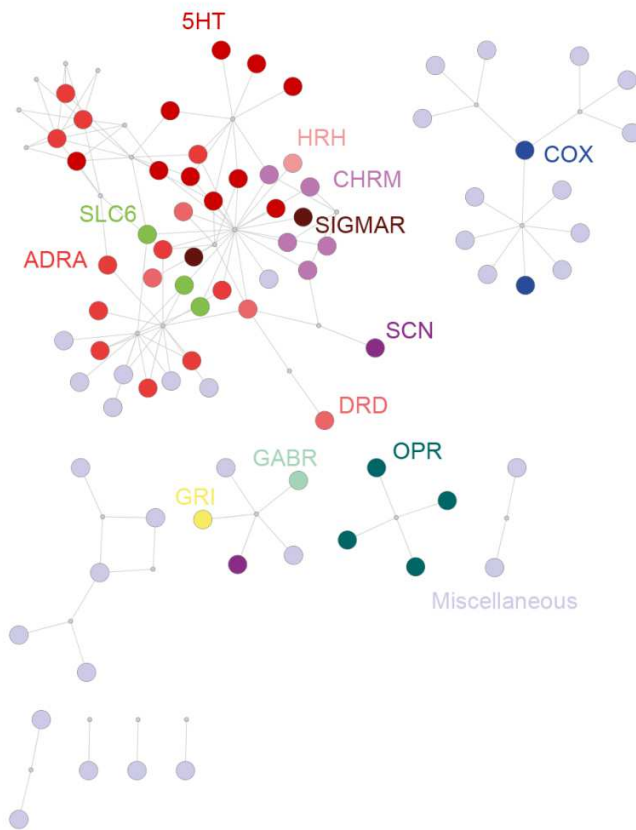

**Supplementary Figure S4. Depression Target Network.** A drug-target network was generated with Cytoscape 3.0, by retrieving all drugs that produce depression as side effect from SIDER 2 and their targets from DrugBank and PDSP Ki. An edge was placed between a drug node and a target node if the protein is a target of that drug in the reference database. Drug nodes were minimized in order to visualize the tinnitus target space. Targets were color-coded according to protein family members.

**Supplementary Table S1: Side effects.** Drugs that produce tinnitus, hearing impairment, hyperacusis and depression were downloaded from SIDER 2 (<http://sideeffects.embl.de>) as of September 2012. (See supplementary excel files).

**Supplementary Table S2: Number of drugs in the Drug Network**

| <b>ATC CODE</b>                    | <b>Total Drugs</b> | <b>Drugs in Giant Component</b> |
|------------------------------------|--------------------|---------------------------------|
| A: Alimentary tract and metabolism | 17                 | 9                               |
| B: Blood and blood forming organs  | 2                  | 0                               |
| C: Cardiovascular system           | 51                 | 36                              |
| D: Dermatologicals                 | 6                  | 3                               |
| G: Genito-urinary system           | 10                 | 6                               |
| H: Systemic hormonal preparations  | 2                  | 0                               |
| J: Antiinfectives                  | 25                 | 1                               |
| L: Antineoplastic                  | 21                 | 8                               |
| M: Musculo-skeletal system         | 25                 | 21                              |
| N: Nervous system                  | 94                 | 85                              |
| P: Antiparasitic                   | 3                  | 1                               |
| R: Respiratory system              | 8                  | 7                               |
| S: Sensory organs                  | 3                  | 2                               |
| V: Various                         | 10                 | 1                               |
| <b>GRAND TOTAL</b>                 | <b>277</b>         | <b>180</b>                      |

**Supplementary Table S3: Drug Targets.** Protein targets were extracted from a drug-target reference database built with drugs and targets derived from DrugBank (<http://www.drugbank.ca/>) and the NIMH Psychoactive Drug Screening Program (PDSP) Ki Database (<http://pdsp.med.unc.edu/pdsp.php>), as of September 2012. PubChemID were extracted from <http://pubchem.ncbi.nlm.nih.gov/> and ATC codes from the World Health Organization Center for drug Statistics Methodology [http://www.whocc.no/atc\\_ddd\\_index/](http://www.whocc.no/atc_ddd_index/). Column E

indicates the 1<sup>st</sup> Level ATC code used for color-coding in Figure 1. (See supplementary excel files).

**Supplementary Table S4: Target Description.** Gene names were according to the National center for Biotechnology Information (<http://www.ncbi.nlm.nih.gov/gene>). (See supplementary excel files).

**Supplementary Table S5: Tinnitus.** Statistical calculations for tinnitus as side effect performed according to Methods. Column B indicates the number of times a target is present in the tinnitus database and C the total times each protein is targeted by drugs in the reference database. Column F, q value after correction for false discovery rate. EF, enhancement factor. (See supplementary excel files).

**Supplementary Table S6: Hearing Impaired.** Statistical calculations for hearing impairment as side effect performed according to Methods. Column B indicates the number of times a target is present in the tinnitus database and C the total times each protein is targeted by drugs in the reference database. Column F, q value after correction for false discovery rate. EF, enhancement factor. (See supplementary excel files).

**Supplementary Table S7: Hyperacusis.** Statistical calculations for hyperacusis as side effect performed according to Methods. Column B indicates the number of times a target is present in

the tinnitus database and C the total times each protein is targeted by drugs in the reference database. Column F, q value after correction for false discovery rate. EF, enhancement factor. (See supplementary excel files).

**Supplementary Table S8: Depression.** Statistical calculations for depression as side effect performed according to Methods. Column B indicates the number of times a target is present in the tinnitus database and C the total times each protein is targeted by drugs in the reference database. Column F, q value after correction for false discovery rate. EF, enhancement factor. (See supplementary excel files).

**Supplementary Table S9.** PubMed references which support the link of salicylate and suggest the participation of the serotonergic system and voltage-gated sodium channels in tinnitus.

| <b>Salicylate</b>                                                                         |                                                                        |
|-------------------------------------------------------------------------------------------|------------------------------------------------------------------------|
| reviews including animal and human effects                                                | 1, 2, 3, 4, 5, 6, 7, 8                                                 |
| as side effect in humans                                                                  | 9, 10, 11, 12, 13, 14, 15, 16, 17, 18, 19, 20                          |
| animal models                                                                             | 21, 22, 23, 24, 25, 26, 27, 28, 29, 30, 31, 32, 33, 34, 35, 36, 37, 38 |
| <b>Serotonergic</b>                                                                       |                                                                        |
| increased c-fos expression in gerbil raphe nucleus                                        | 39, 40                                                                 |
| increased serotonin levels in rat inferior colliculus and auditory cortex                 | 41                                                                     |
| increased plasmatic levels of 5-hydroxyindoleacetic acid in humans                        | 42                                                                     |
| serotonin reuptake inhibitors in tinnitus treatment                                       | 43, 44, 45, 46, 47, 48, 49                                             |
| <b>Voltage-gated sodium channels</b>                                                      |                                                                        |
| inhibition of voltage-gated sodium channels in rat inferior colliculus by lidocaine       | 50                                                                     |
| inhibition of voltage-gated channel currents in rat auditory cortex neurons by salicylate | 51, 52                                                                 |
| changes in expression of voltage-gated channels after acoustic trauma in rat cochlea      | 53                                                                     |
| tinnitus reduction by lidocaine in patients                                               | 54, 55, 56, 57, 58, 59, 60, 61, 62, 63, 64                             |
| tinnitus increase by lidocaine in patients                                                | 60, 62                                                                 |
| tinnitus reduction by ropivacaine in patients                                             | 55                                                                     |
| tinnitus reduction by tocainide in patients                                               | 65, 66, 67                                                             |
| tinnitus reduction by carbamazepine in patients                                           | 68, 69, 70, 71                                                         |



1. Cazals, Y. Auditory sensori-neural alterations induced by salicylate. *Prog Neurobiol* 2000, 62: 583-631 (2000).
2. Chen, G. D., *et al.* Salicylate-induced cochlear impairments, cortical hyperactivity and re-tuning, and tinnitus. *Hear Res* 2013, 295: 100-113 (2013).
3. Eggermont, J. J. Hearing loss, hyperacusis, or tinnitus: what is modeled in animal research? *Hear Res* 2013, 295: 140-149 (2013).
4. Evans, E. F., Wilson, J. P. & Borerwe, T. A. Animal models of tinnitus. *Ciba Found Symp* 1981, 85: 108-138 (1981).
5. Jastreboff, P. J. & Sasaki, C. T. An animal model of tinnitus: a decade of development. *Am J Otol* 1994, 15: 19-27 (1994).
6. Knipper, M., Zimmermann, U. & Muller, M. Molecular aspects of tinnitus. *Hear Res* 2010, 266: 60-69 (2010).
7. Puel, J. L. & Guitton, M. J. Salicylate-induced tinnitus: molecular mechanisms and modulation by anxiety. *Prog Brain Res* 2007, 166: 141-146 (2007).
8. Stolzberg, D., Salvi, R. J. & Allman, B. L. Salicylate toxicity model of tinnitus. *Front Syst Neurosci* 2012, 6: 28 (2012).
9. Chyka, P. A., *et al.* Salicylate poisoning: an evidence-based consensus guideline for out-of-hospital management. *Clin Toxicol (Phila)* 2007, 45: 95-131 (2007).
10. Day, R. O., *et al.* Concentration-response relationships for salicylate-induced ototoxicity in normal volunteers. *Br J Clin Pharmacol* 1989, 28: 695-702 (1989).
11. Grigor, R. R., Spitz, P. W. & Furst, D. E. Salicylate toxicity in elderly patients with rheumatoid arthritis. *J Rheumatol* 1987, 14: 60-66 (1987).
12. Halla, J. T., Atchison, S. L. & Hardin, J. G. Symptomatic salicylate ototoxicity: a useful indicator of serum salicylate concentration? *Ann Rheum Dis* 1991, 50: 682-684 (1991).
13. Halla, J. T. & Hardin, J. G. Salicylate ototoxicity in patients with rheumatoid arthritis: a controlled study. *Ann Rheum Dis* 1988, 47: 134-137 (1988).
14. Janssen, T., Boege, P., Oestreicher, E. & Arnold, W. Tinnitus and 2f1-f2 distortion product otoacoustic emissions following salicylate overdose. *J Acoust Soc Am* 2000, 107: 1790-1792 (2000).

15. Jung, T. T., Rhee, C. K., Lee, C. S., Park, Y. S. & Choi, D. C. Ototoxicity of salicylate, nonsteroidal antiinflammatory drugs, and quinine. *Otolaryngol Clin North Am* 1993, 26: 791-810 (1993).
16. Myers, E. N. & Bernstein, J. M. Salicylate ototoxicity; a clinical and experimental study. *Arch Otolaryngol* 1965, 82: 483-493 (1965).
17. Proudfoot, A. T. Toxicity of salicylates. *Am J Med* 1983, 75: 99-103 (1983).
18. Rivera, W., Kleinschmidt, K. C., Velez, L. I., Shepherd, G. & Keyes, D. C. Delayed salicylate toxicity at 35 hours without early manifestations following a single salicylate ingestion. *Ann Pharmacother* 2004, 38: 1186-1188 (2004).
19. Temple, A. R. Acute and chronic effects of aspirin toxicity and their treatment. *Arch Intern Med* 1981, 141: 364-369 (1981).
20. Atkinson, M. H., Menard, H. A. & Kalish, G. H. Assessment of salsalate, a nonacetylated salicylate, in the treatment of patients with arthritis. *Clin Ther* 1995, 17: 827-837 (1995).
21. Bauer, C. A., Brozoski, T. J., Rojas, R., Boley, J. & Wyder, M. Behavioral model of chronic tinnitus in rats. *Otolaryngol Head Neck Surg* 1999, 121: 457-462 (1999).
22. Berger, J. I., Coomber, B., Shackleton, T. M., Palmer, A. R. & Wallace, M. N. A novel behavioural approach to detecting tinnitus in the guinea pig. *J Neurosci Methods* 2013, 213: 188-195 (2013).
23. Cheng, K. S., Chen, L. H. & Wang, Y. J. The identification and clustering analysis of auditory neurons for salicylated-induced rat model. *Conf Proc IEEE Eng Med Biol Soc* 2005, 6: 6281-6284 (2005).
24. Guitton, M. J. Tinnitus-provoking salicylate treatment triggers social impairments in mice. *J Psychosom Res* 2009, 67: 273-276 (2009).
25. Guitton, M. J., *et al.* Salicylate induces tinnitus through activation of cochlear NMDA receptors. *J Neurosci* 2003, 23: 3944-3952 (2003).
26. Holt, A. G., Bissig, D., Mirza, N., Rajah, G. & Berkowitz, B. Evidence of key tinnitus-related brain regions documented by a unique combination of manganese-enhanced MRI and acoustic startle reflex testing. *PLoS One* 2010, 5: e14260 (2010).
27. Jastreboff, P. J. & Brennan, J. F. Evaluating the loudness of phantom auditory perception (tinnitus) in rats. *Audiology* 1994, 33: 202-217 (1994).
28. Jastreboff, P. J., Brennan, J. F. & Sasaki, C. T. An animal model for tinnitus. *Laryngoscope* 1988, 98: 280-286 (1988).

29. Kizawa, K., *et al.* Behavioral assessment and identification of a molecular marker in a salicylate-induced tinnitus in rats. *Neuroscience* 2010, 165: 1323-1332 (2010).
30. Lobarinas, E., *et al.* Effects of the potassium ion channel modulators BMS-204352 Maxipost and its R-enantiomer on salicylate-induced tinnitus in rats. *Physiol Behav* 2011, 104: 873-879 (2011).
31. Norena, A. J., Moffat, G., Blanc, J. L., Pezard, L. & Cazals, Y. Neural changes in the auditory cortex of awake guinea pigs after two tinnitus inducers: salicylate and acoustic trauma. *Neuroscience* 2010, 166: 1194-1209 (2010).
32. Paul, A. K., *et al.* Metabolic imaging of rat brain during pharmacologically-induced tinnitus. *Neuroimage* 2009, 44: 312-318 (2009).
33. Ruttiger, L., Ciuffani, J., Zenner, H. P. & Knipper, M. A behavioral paradigm to judge acute sodium salicylate-induced sound experience in rats: a new approach for an animal model on tinnitus. *Hear Res* 2003, 180: 39-50 (2003).
34. Stolzberg, D., *et al.* A novel behavioral assay for the assessment of acute tinnitus in rats optimized for simultaneous recording of oscillatory neural activity. *J Neurosci Methods* 2013, 219: 224-232 (2013).
35. Sun, W., Doolittle, L., Flowers, E., Zhang, C. & Wang, Q. High Doses of Salicylate Causes Prepulse Facilitation of Onset-Gap Induced Acoustic Startle Response. *Behav Brain Res* 2013: (2013).
36. Wei, L., Ding, D., Sun, W., Xu-Friedman, M. A. & Salvi, R. Effects of sodium salicylate on spontaneous and evoked spike rate in the dorsal cochlear nucleus. *Hear Res* 2010, 267: 54-60 (2010).
37. Zheng, Y., Baek, J. H., Smith, P. F. & Darlington, C. L. Cannabinoid receptor down-regulation in the ventral cochlear nucleus in a salicylate model of tinnitus. *Hear Res* 2007, 228: 105-111 (2007).
38. Zheng, Y., Stiles, L., Hamilton, E., Smith, P. F. & Darlington, C. L. The effects of the synthetic cannabinoid receptor agonists, WIN55,212-2 and CP55,940, on salicylate-induced tinnitus in rats. *Hear Res* 2010, 268: 145-150 (2010).
39. Caperton, K. K. & Thompson, A. M. Activation of serotonergic neurons during salicylate-induced tinnitus. *Laryngoscope* 2010, 120 Suppl 4: S203 (2010).
40. Caperton, K. K. & Thompson, A. M. Activation of serotonergic neurons during salicylate-induced tinnitus. *Otol Neurotol* 2011, 32: 301-307 (2011).
41. Liu, J., *et al.* Effects of salicylate on serotonergic activities in rat inferior colliculus and auditory cortex. *Hear Res* 2003, 175: 45-53 (2003).

42. Kim, D. K., *et al.* Diagnostic value and clinical significance of stress hormones in patients with tinnitus. *Eur Arch Otorhinolaryngol* 2013; (2013).
43. Baldo, P., Doree, C., Molin, P., McFerran, D. & Cecco, S. Antidepressants for patients with tinnitus. *Cochrane Database Syst Rev* 2012, 9: CD003853 (2012).
44. Oishi, N., *et al.* Effects of selective serotonin reuptake inhibitor on treating tinnitus in patients stratified for presence of depression or anxiety. *Audiol Neurootol* 2010, 15: 187-193 (2010).
45. Baldo, P., Doree, C., Lazzarini, R., Molin, P. & McFerran, D. J. Antidepressants for patients with tinnitus. *Cochrane Database Syst Rev* 2006: CD003853 (2006).
46. Robinson, S. K., Viirre, E. S. & Stein, M. B. Antidepressant therapy in tinnitus. *Hear Res* 2007, 226: 221-231 (2007).
47. Robinson, S. K., *et al.* Randomized placebo-controlled trial of a selective serotonin reuptake inhibitor in the treatment of nondepressed tinnitus subjects. *Psychosom Med* 2005, 67: 981-988 (2005).
48. Folmer, R. L. & Shi, Y. B. SSRI use by tinnitus patients: interactions between depression and tinnitus severity. *Ear Nose Throat J* 2004, 83: 107-108, 110, 112 passim (2004).
49. Christensen, R. C. Paroxetine in the treatment of tinnitus. *Otolaryngol Head Neck Surg* 2001, 125: 436-438 (2001).
50. Yu, M. & Chen, L. Modulation of major voltage- and ligand-gated ion channels in cultured neurons of the rat inferior colliculus by lidocaine. *Acta Pharmacol Sin* 2008, 29: 1409-1418 (2008).
51. Liu, Y., *et al.* Inhibition of voltage-gated channel currents in rat auditory cortex neurons by salicylate. *Neuropharmacology* 2007, 53: 870-880 (2007).
52. Liu, Y. & Li, X. Effects of salicylate on voltage-gated sodium channels in rat inferior colliculus neurons. *Hear Res* 2004, 193: 68-74 (2004).
53. Fryatt, A. G., Mulheran, M., Egerton, J., Gunthorpe, M. J. & Grubb, B. D. Ototrauma induces sodium channel plasticity in auditory afferent neurons. *Mol Cell Neurosci* 2011, 48: 51-61 (2011).
54. Shemirani, N., Tang, D. & Friedland, D. R. Acute auditory and vestibular symptoms associated with heat and transdermal lidocaine. *Clin J Pain* 2010, 26: 58-59 (2010).
55. Kallio, H., *et al.* I.V. ropivacaine compared with lidocaine for the treatment of tinnitus. *Br J Anaesth* 2008, 101: 261-265 (2008).

56. Baguley, D. M., Jones, S., Wilkins, I., Axon, P. R. & Moffat, D. A. The inhibitory effect of intravenous lidocaine infusion on tinnitus after translabyrinthine removal of vestibular schwannoma: a double-blind, placebo-controlled, crossover study. *Otol Neurotol* 2005, 26: 169-176 (2005).
57. Kalcioglu, M. T., Bayindir, T., Erdem, T. & Ozturan, O. Objective evaluation of the effects of intravenous lidocaine on tinnitus. *Hear Res* 2005, 199: 81-88 (2005).
58. Marzo, S., Stankiewicz, J. A. & Consiglio, A. P. Lidocaine for the relief of incapacitating tinnitus. *Ear Nose Throat J* 2004, 83: 236-238 (2004).
59. Otsuka, K., Pulec, J. L. & Suzuki, M. Assessment of intravenous lidocaine for the treatment of subjective tinnitus. *Ear Nose Throat J* 2003, 82: 781-784 (2003).
60. Reyes, S. A., *et al.* Brain imaging of the effects of lidocaine on tinnitus. *Hear Res* 2002, 171: 43-50 (2002).
61. den Hartigh, J., *et al.* Tinnitus suppression by intravenous lidocaine in relation to its plasma concentration. *Clin Pharmacol Ther* 1993, 54: 415-420 (1993).
62. Duckert, L. G. & Rees, T. S. Treatment of tinnitus with intravenous lidocaine: a double-blind randomized trial. *Otolaryngol Head Neck Surg* 1983, 91: 550-555 (1983).
63. Martin, F. W. & Colman, B. H. Tinnitus: a double-blind crossover controlled trial to evaluate the use of lignocaine. *Clin Otolaryngol Allied Sci* 1980, 5: 3-11 (1980).
64. Shiomi, Y., *et al.* Tinnitus remission by lidocaine demonstrated by auditory-evoked magnetoencephalogram. A preliminary report. *Acta Otolaryngol* 1997, 117: 31-34 (1997).
65. Emmett, J. R. & Shea, J. J. Treatment of tinnitus with tocainide hydrochloride. *Otolaryngol Head Neck Surg* 1980, 88: 442-446 (1980).
66. Hulshof, J. H. & Vermeij, P. The effect of intra-venous lidocaine and several different doses oral tocainide HCl on tinnitus. A dose-finding study. *Acta Otolaryngol* 1984, 98: 231-238 (1984).
67. Hulshof, J. H. & Vermeij, P. The value of tocainide in the treatment of tinnitus. A double-blind controlled study. *Arch Otorhinolaryngol* 1985, 241: 279-283 (1985).
68. Donaldson, I. Tegretol: a double blind trial in tinnitus. *J Laryngol Otol* 1981, 95: 947-951 (1981).

69. Levine, R. A. Typewriter tinnitus: a carbamazepine-responsive syndrome related to auditory nerve vascular compression. *ORL J Otorhinolaryngol Relat Spec* 2006, 68: 43-46; discussion 46-47 (2006).
70. Mardini, M. K. Ear-clicking "tinnitus" responding to carbamazepine. *N Engl J Med* 1987, 317: 1542 (1987).
71. Nam, E. C., Handzel, O. & Levine, R. A. Carbamazepine responsive typewriter tinnitus from basilar invagination. *J Neurol Neurosurg Psychiatry* 2010, 81: 456-458 (2010).
